# Supplementary material for: Advanced yolk–shell hydroxyapatite for bone graft materials: kilogram-scale production and structure-in vitro bioactivity relationship
Source: Royal Society of Chemistry journal article supplement (doi:10.1039/c4ra02925a), 2014-01-01
Supplement: c4ra02925a1.pdf [file c4ra02925a1.pdf]

## Supporting Information

### **Advanced Yolk-Shell Hydroxyapatite for Bone Graft Materials: Kilogram-Scale Production and Structure-*in vitro* Bioactivity Relationship**

*Jung Sang Cho and Yun Chan Kang\**

J. S. Cho, Prof. Y.C. Kang  
Department of Chemical Engineering  
Konkuk University  
1 Hwayang-Dong Gwangjin-Gu  
Seoul 143-701, Republic of Korea  
E-mail: [yckang@konkuk.ac.kr](mailto:yckang@konkuk.ac.kr)

Keywords: yolk-shell structure, hydroxyapatite, biomaterial, bioactivity, spray drying

#### **This file includes:**

- Schematic diagram and digital photo of spray dryer applied in the preparation of composite precursor powders of calcium nitrate, diammonium hydrogen phosphate, and dextrin.
- Schematic diagram of spray pyrolysis system applied in the preparation of filled-structured HAp powders.
- HR-TEM image and SAED pattern of the filled-structured HAp powders.

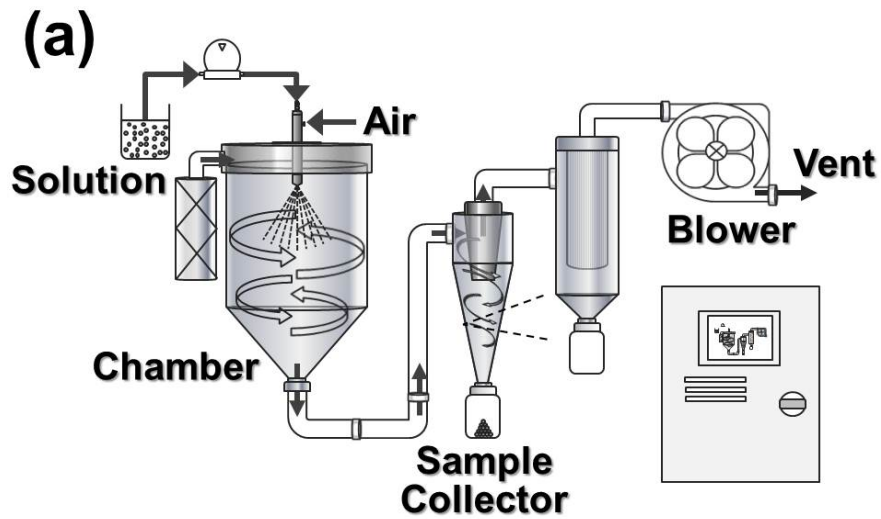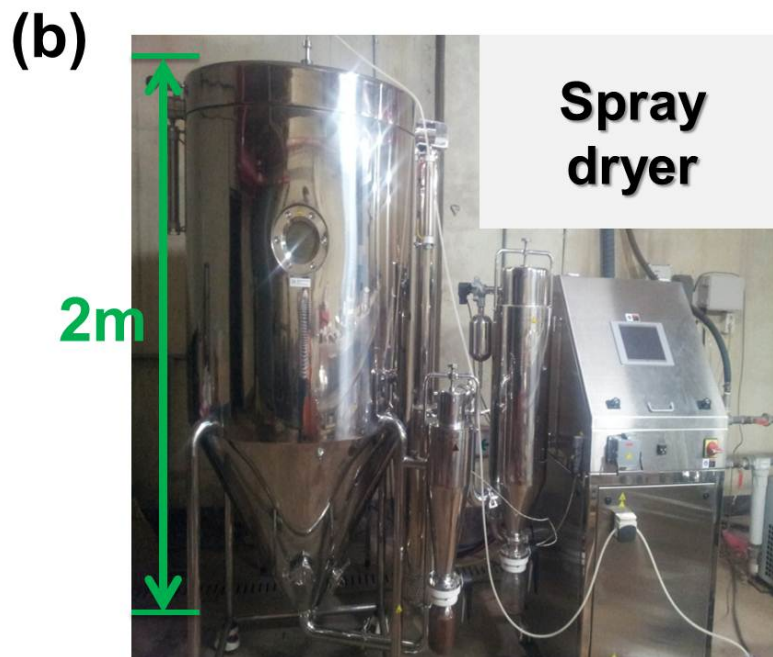

**Fig. S1.** Schematic diagram and digital photo of spray dryer applied in the preparation of composite precursor powders of calcium nitrate, diammonium hydrogen phosphate, and dextrin.

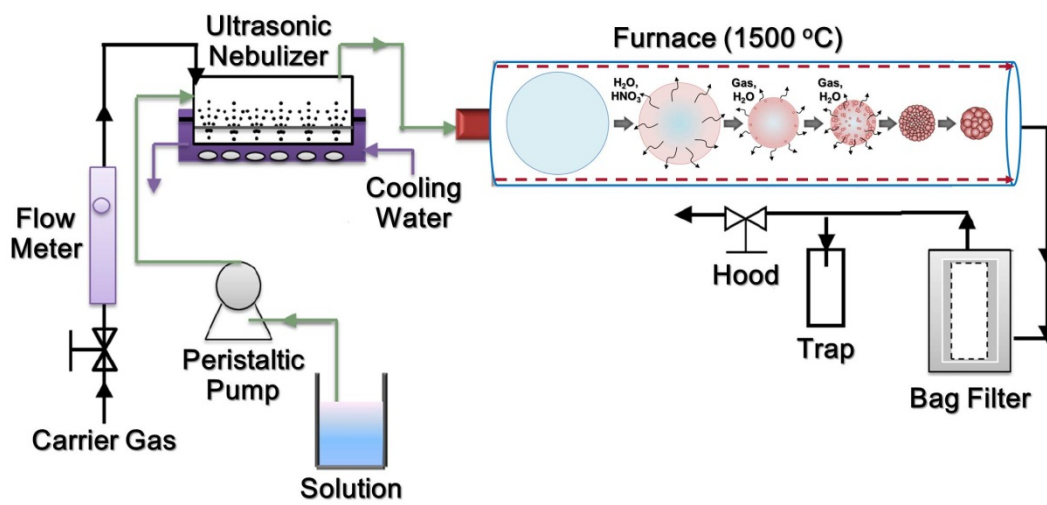

**Fig. S2.** Schematic diagram of spray pyrolysis system applied in the preparation of filled-structured HAp powders.

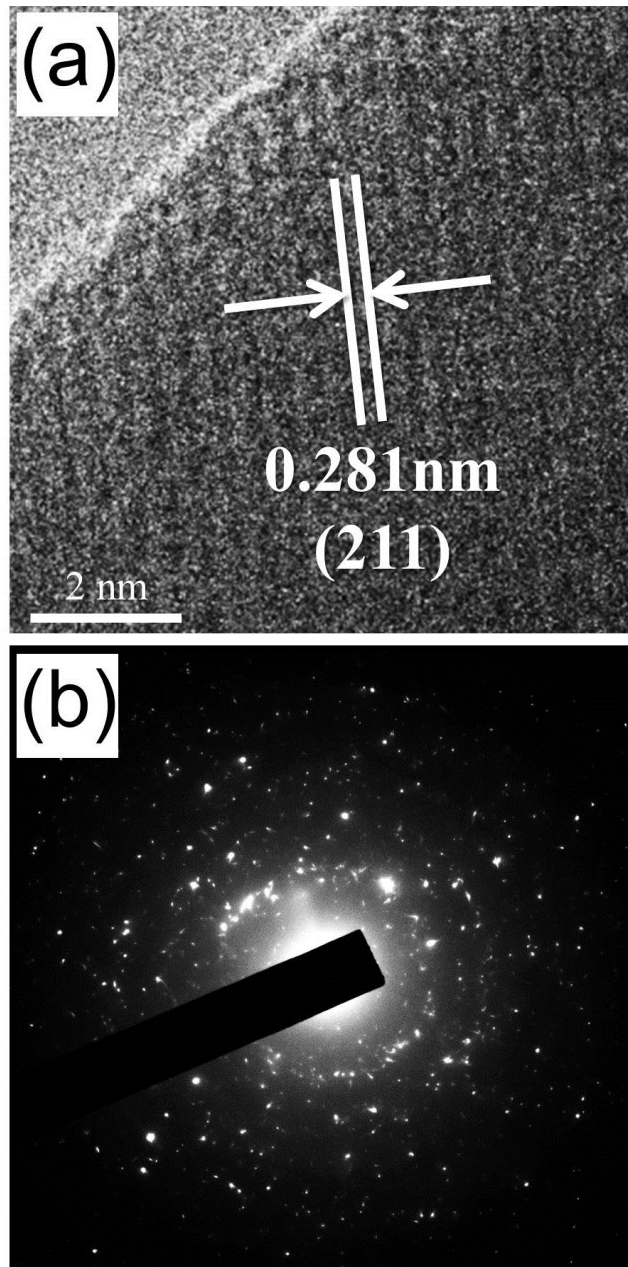

**Fig. S3.** (a) HR-TEM image and (b) SAED pattern of the filled-structured HAp powders.
